# Supplementary material
Source: PubMed Central journal article supplement (PMC7444316)
Supplement: NIHMS1612744-supplement-Supp_figure1.pdf [file NIHMS1612744-supplement-Supp_figure1.pdf]

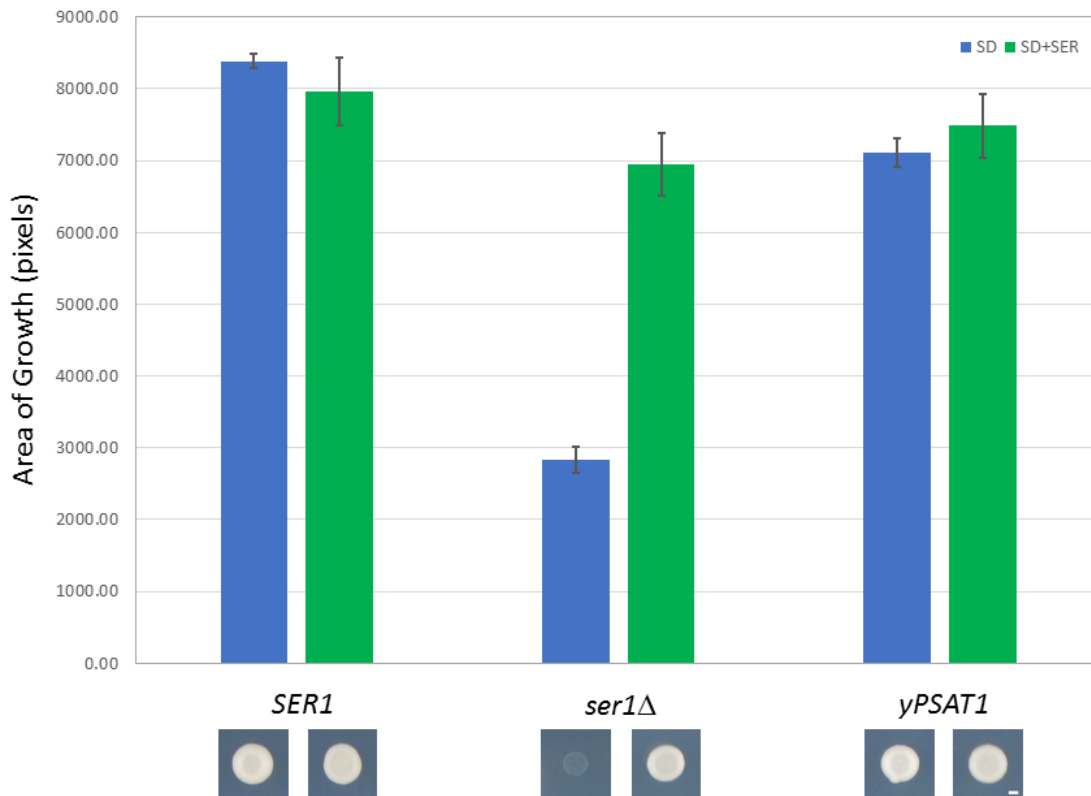

**Figure S1. Growth on minimal media in the presence and absence of serine.** *yPSAT1* can functionally replace the yeast *SER1* as assayed by quantitative growth of yeast cells replica pinned onto minimal medium lacking serine or supplemented with 100 mM L-serine. Values are the area estimates for each genotype +/- their standard errors derived from fitting a linear model to these data (Materials and Methods). Assays were performed in replicate (2-4 independently constructed clones with ~50 technical replicates of each). The representative images of yeast patch growth of strains harboring a given allele are all the same size and (other than cropping) have not been manipulated. The scale bar represents 1 mm in length.
